# Supplementary material for: Connections between Exoproteome Heterogeneity and Virulence in the Oral Pathogen Aggregatibacter actinomycetemcomitans
Source: PubMed Central journal article supplement (PMC9239275; doi:10.1128/msystems.00254-22), 2022-06-13

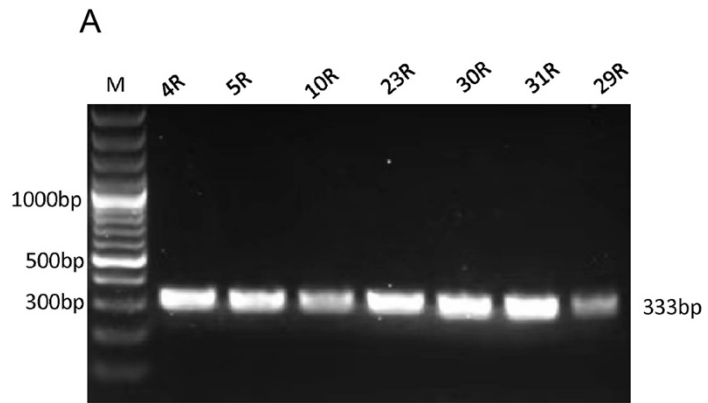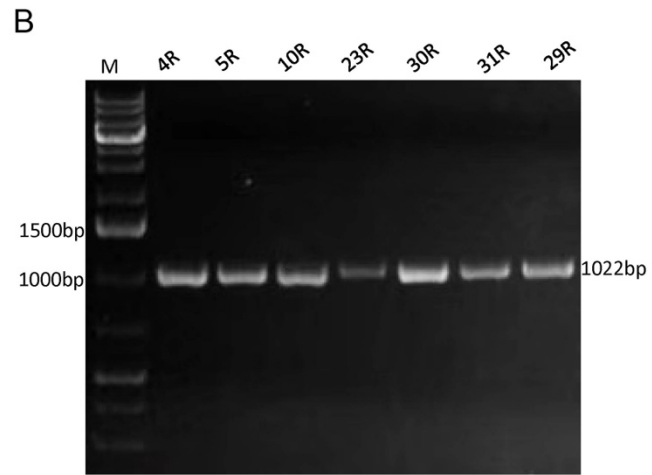

**C**

| Strains | Passages<br>(from rough to smooth) |
|---------|------------------------------------|
| Aa4R    | 14                                 |
| Aa5R    | 12                                 |
| Aa10R   | 12                                 |
| Aa23R   | 6                                  |
| Aa29R   | 10                                 |
| Aa30R   | 11                                 |
| Aa31R   | 8                                  |

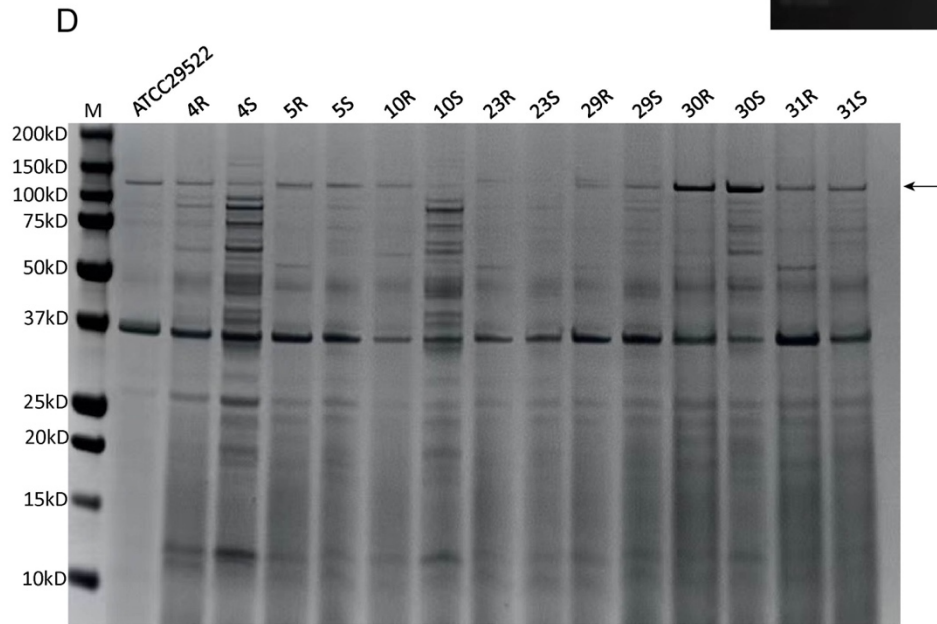

Supplement: msystems.00254-22-sf001.pdf [file msystems.00254-22-sf001.pdf]
