# Supplementary material for: Connections between Exoproteome Heterogeneity and Virulence in the Oral Pathogen Aggregatibacter actinomycetemcomitans
Source: PubMed Central journal article supplement (PMC9239275; doi:10.1128/msystems.00254-22), 2022-06-13

A

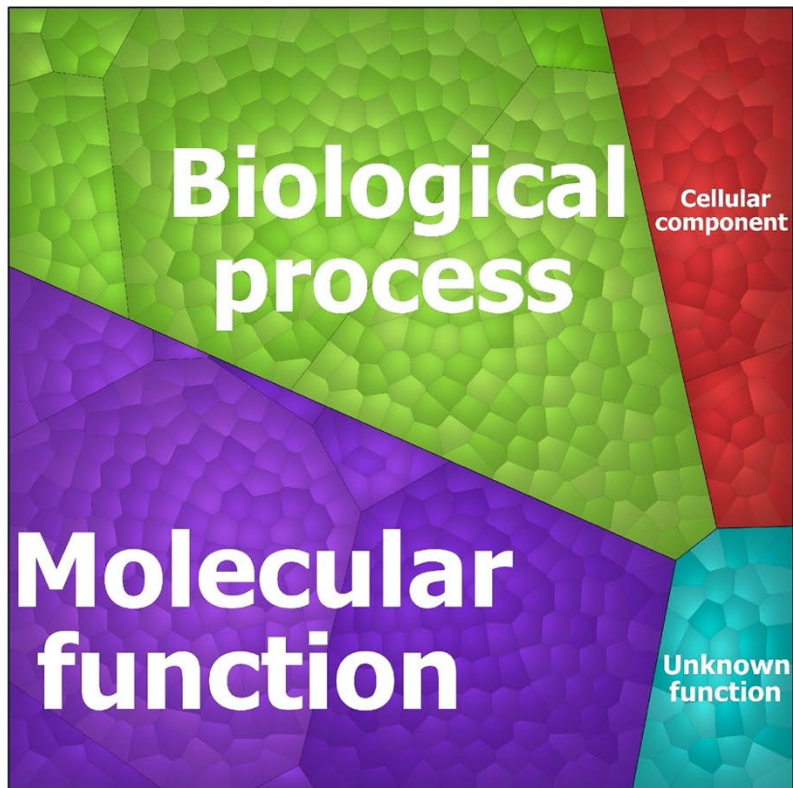

B

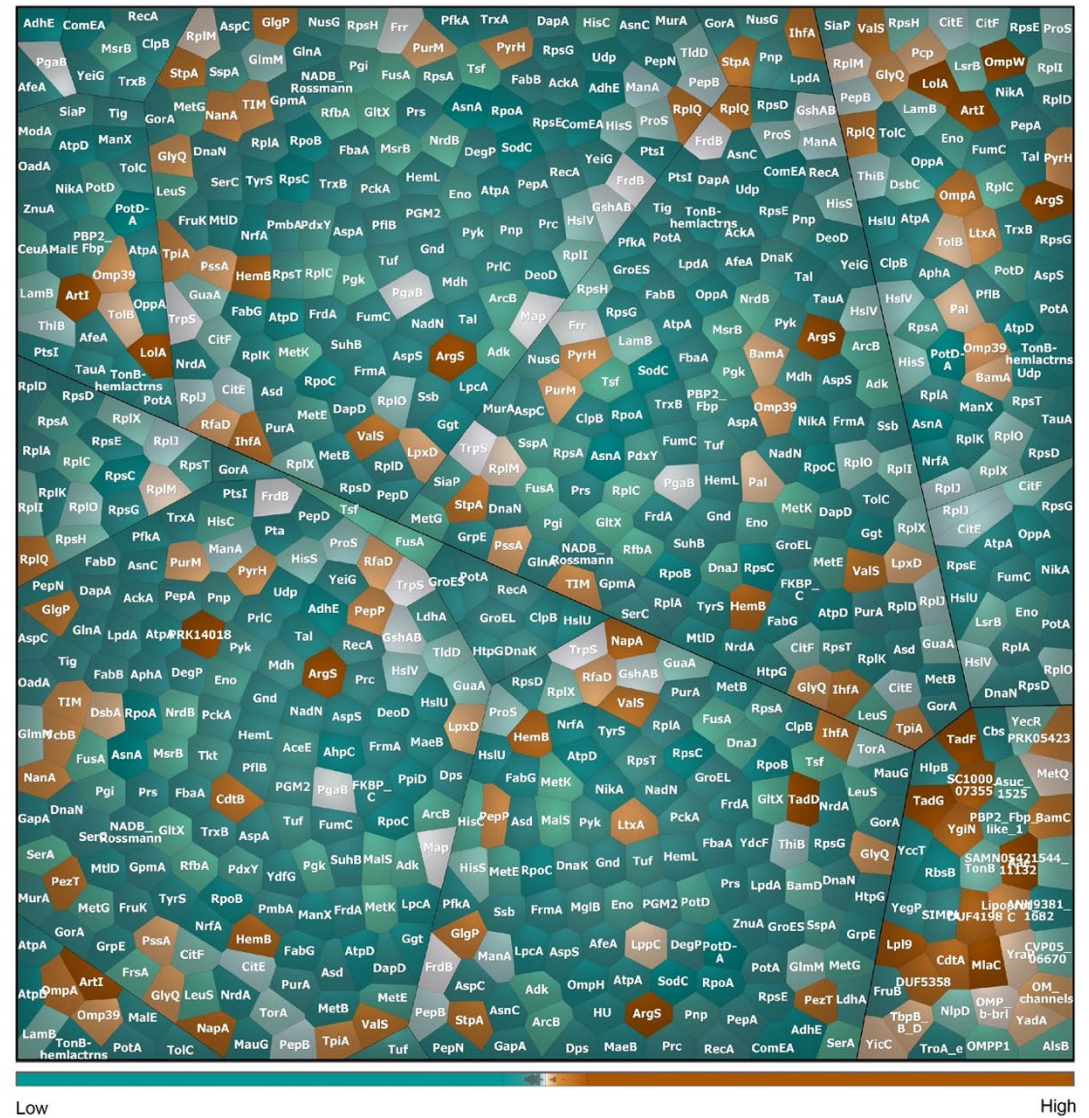

Supplement: msystems.00254-22-sf003.pdf [file msystems.00254-22-sf003.pdf]
