# Supplementary material for: Connections between Exoproteome Heterogeneity and Virulence in the Oral Pathogen Aggregatibacter actinomycetemcomitans
Source: PubMed Central journal article supplement (PMC9239275; doi:10.1128/msystems.00254-22), 2022-06-13
Supplement: msystems.00254-22-st001.pdf [file msystems.00254-22-st001.pdf]

**Supplementary Table S1. Genetic variations in different *Aa* pairs**

| Pairs       | Position* | Mutation | Annotation | Description                                                                                                                      | Gene                |
|-------------|-----------|----------|------------|----------------------------------------------------------------------------------------------------------------------------------|---------------------|
| 4R VS 4S    | 861599    | Δ1bp     | Intergenic | Flp pilus assembly protein, pilin Flp/Metal-dependent hydrolase YbeY, involved in rRNA and /or ribosome maturation and assembly  | <i>flp</i> promotor |
| 5R VS 5S    | 863134    | T→C      | Intergenic | Flp pilus assembly protein, pilin Flp /Phosphate starvation-inducible protein PhoH, predicted ATPase                             | <i>flp</i> promotor |
| 23R VS 23S  | 863092    | T→C      | Intergenic | Flp pilus assembly protein, pilin Flp /Phosphate starvation-inducible protein PhoH, predicted ATPase                             | <i>flp</i> promotor |
| 30R VS 30S  | 894165    | T→G      | Intergenic | Flp pilus assembly protein, pilin Flp /Phosphate starvation-inducible protein PhoH, predicted ATPase                             | <i>flp</i> promotor |
| 31R VS 31S  | 1029359   | T→A      | Genic      | Single-stranded-DNA-specific exonuclease RecJ                                                                                    | <i>recJ</i>         |
| 4R VS ATCC  | 1478055   | Δ1bp     | Intergenic | Metal-dependent hydrolase YbeY, involved in rRNA and /or ribosome maturation and assembly/ Flp pilus assembly protein, pilin Flp | <i>flp</i> promotor |
| 5R VS ATCC  | 863123    | Δ1bp     | Intergenic | Flp pilus assembly protein, pilin Flp /Phosphate starvation-inducible protein PhoH, predicted ATPase                             | <i>flp</i> promotor |
| 23R VS ATCC | 1539574   | Δ1bp     | Intergenic | Flp pilus assembly protein, pilin Flp /Phosphate starvation-inducible protein PhoH, predicted ATPase                             | <i>flp</i> promotor |
| 30R VS ATCC | 894167    | Δ1bp     | Intergenic | Flp pilus assembly protein, pilin Flp /Phosphate starvation-inducible protein PhoH, predicted ATPase                             | <i>flp</i> promotor |
| 31R VS ATCC | 884999    | Δ1bp     | Intergenic | Flp pilus assembly protein, pilin Flp /Phosphate starvation-inducible protein PhoH, predicted ATPase                             | <i>flp</i> promotor |

\*Please note that the position of the SNPs in the pairwise comparisons of R isolates and their derivative S strains refers to the position in the genome sequences of the S strains submitted to NCBI. The position of the SNP detected in the *flp* promoter region of the ATCC 29522 type strain of *Aa* refers to the respective position in the genome of the R isolate that was used in the respective SNPs analysis.
